1  
 2 Intraspecific scaling of the minimum metabolic cost of transport in Leghorn chickens  
 3 (*Gallus gallus domesticus*): links with limb kinematics, morphometrics and posture

4  
 5  
 6

7 Kayleigh A. Rose, Robert L. Nudds and Jonathan R. Codd\*

8  
 9

10  
 11  
 12 Faculty of Life Sciences, University of Manchester, Manchester, M13 9PT, UK

13  
 14  
 15

16 \*Address for reprints and other correspondence:

17 Dr. Jonathan Codd

18 Faculty of Life Sciences,

19 University of Manchester,

20 Manchester M13 9PT, UK

21 e-mail: [jonathan.codd@manchester.ac.uk](mailto:jonathan.codd@manchester.ac.uk)

22 Tel: +44(0) 161 275 5474

23  
 24  
 25

26  
 27  
 28

29  
 30  
 31

32  
 33  
 34

## ABSTRACT

The minimum metabolic cost of transport ( $\text{CoT}_{\min}$ ;  $\text{J kg}^{-1} \text{ m}^{-1}$ ) scales negatively with increasing body mass ( $\propto M_b^{-1/3}$ ) across species from a wide range of taxa associated with marked differences in body plan. At the intraspecific level, or between closely related species, however,  $\text{CoT}_{\min}$  does not always scale with  $M_b$ . Similarity in physiology, dynamics of movement, skeletal geometry and posture between closely related individuals is thought to be responsible for this phenomenon, despite the fact that energetic, kinematic and morphometric data are rarely collected together. We examined the relationship between these integrated components of locomotion in Leghorn chickens (*Gallus gallus domesticus*) selectively bred for large and bantam (miniature) varieties. Interspecific allometry predicts a  $\text{CoT}_{\min}$  ~16 % greater in bantams compared to the larger variety. However, despite 38 % and 23 % differences in  $M_b$  and leg length, respectively, both varieties shared an identical walking  $\text{CoT}_{\min}$ , independent of speed and equal to the allometric prediction derived from interspecific data for the larger variety. Furthermore, both varieties moved with dynamic similarity and shared geometrically similar appendicular and axial skeletons. Hip height, however, did not scale geometrically and the smaller variety had more erect limbs, contrary to interspecific scaling trends. The lower than predicted  $\text{CoT}_{\min}$  in bantams for their  $M_b$  was associated with both the more erect posture and a lower cost per stride ( $\text{J kg}^{-1} \text{ stride}^{-1}$ ). Therefore, our findings are consistent with the notion that a more erect limb is associated with a lower  $\text{CoT}_{\min}$  and with the previous assumption that similarity in skeletal shape, inherently linked to walking dynamics, is associated with similarity in  $\text{CoT}_{\min}$ .

**KEY WORDS:** Size, Terrestrial locomotion, Energetics, Kinematics, Morphometrics

## 68 INTRODUCTION

69 Body size has a significant influence on the morphology and metabolism of animals  
 70 (Schmidt-Nielsen, 1975; Schmidt-Nielsen, 1984; Biewener, 1989). In animals that  
 71 locomote terrestrially the absolute amount of metabolic energy required to move a  
 72 given distance, increases with increasing body size, but not in direct proportion (slope  
 73  $<1$ ) (Bruinzeel et al., 1999; Halsey and White, 2012). In relative terms, the mass-  
 74 specific energy per unit distance [the cost of transport (CoT;  $\text{J kg}^{-1} \text{m}^{-1}$ )] is lower in  
 75 larger species than in smaller ones. Often, at optimal self-selected speeds within a  
 76 gait, animals incur a minimum cost of transport ( $\text{CoT}_{\min}$ ) and it seems reasonable to  
 77 expect natural selection to favour strategies that minimise the  $\text{CoT}_{\min}$ . For example, if  
 78 the movement requirements of animals were similar, they would be expected to share  
 79 optimum limb dynamics, and similar morphological proportions to allow it  
 80 (Alexander and Jayes, 1983). The evolutionary allometry of  $\text{CoT}_{\min}$  with body mass  
 81 ( $M_b$ , kg) is widely reported. For example, across more than 90 species of mammals  
 82 and birds (7 g - 260 kg),  $\text{CoT}_{\min} = 10.7M_b^{-0.32}$  (Taylor et al., 1982). Adding  
 83 amphibians, reptiles and invertebrates ( $< 1$  g) to this data set yielded a similar result  
 84 ( $\text{CoT}_{\min} = 10.8M_b^{-0.32}$  (Full and Tu, 1991)) and African elephants (*Loxodonta*  
 85 *africana*,  $M_b = 1542$  kg) fall within the 95% CIs of this equation (Langman et al.,  
 86 1995). The scaling exponent, however, is known to differ between walking and  
 87 running (Margaria et al., 1963; Minetti et al., 1999; Rubenson et al., 2004; Rubenson  
 88 et al., 2007; Maloiy et al., 2009; Nudds et al., 2011; Watson et al., 2011), and also  
 89 between small crouched- and large upright-postured vertebrates (Reilly et al., 2007;  
 90 Nudds et al., 2009). Furthermore, there is overlooked variation in  $\text{CoT}_{\min}$  at a given  
 91  $M_b$ , associated with variation in body form (Full et al., 1990). The general trend of  
 92 decreasing  $\text{CoT}_{\min}$  with  $M_b$ , however, holds for over three orders of magnitude. Where  
 93 outliers exist, their relatively more or less economical  $\text{CoT}_{\min}$  compared to other  
 94 species of the same  $M_b$  is attributed to adaptations associated with activity patterns  
 95 (Watson et al., 2011), dominant locomotor mode (Dawson and Taylor, 1973; Fish et  
 96 al., 2000; Griffin and Kram, 2000; Fish et al., 2001; Nudds et al., 2010), ecological  
 97 niche (Bruinzeel et al., 1999), climate (Yousef et al., 1989; Maloiy et al., 2009) or  
 98 having a protective shell (Baudinette et al., 2000; Zani and Kram, 2008). Ultimately,  
 99 the reasons underlying the allometry of  $\text{CoT}_{\min}$  with  $M_b$  and the factors that determine  
 100 the CoT are not yet fully understood (Cavagna et al., 1977; Fedak et al., 1982;

101 Heglund et al., 1982a; Heglund et al., 1982b; Heglund and Taylor, 1988; Kram and  
 102 Taylor, 1990; Roberts et al., 1998; Pontzer, 2005, 2007).

103       Between disparate species, musculoskeletal morphology and shape vary with  
 104 size (Schmidt-Nielsen, 1975; Schmidt-Nielsen, 1984; Biewener, 1989; Reilly et al.,  
 105 2007), speed requirements (Garland, 1983), climate (Janis and Wilhelm, 1993),  
 106 ecological niche (Bruinzeel et al., 1999) and locomotor mode (Griffin and Kram,  
 107 2000; Abourachid, 2001; Nudds et al., 2010). Within species or between closely  
 108 related species, however, variation in shape is reduced, meaning insight can be gained  
 109 into the factors that dictate the CoT and how it scales with  $M_b$  independent of shape  
 110 (Griffin et al., 2004; Day and Jayne, 2007; Langman et al., 2012). For example,  
 111 miniature Arabian and draft horses (*Equus ferus caballus*) showed no difference in  
 112  $CoT_{min}$  when trotting, despite spanning 8- and 2-fold differences in  $M_b$  and leg length,  
 113 respectively (Griffin et al., 2004). Similarly, there was little difference in walking  
 114  $CoT_{min}$  within camels (*Camelus dromedaries*,  $M_b = 240$ -580 kg) (Yousef et al., 1989;  
 115 Maloiy et al., 2009) or donkeys (*Equus asinus*,  $M_b = 170$ -583 kg) (Yousef et al., 1972;  
 116 Maloiy et al., 2009), or between adult Asian (*Elephas maximus*) and sub-adult African  
 117 elephants ( $M_b = 1435$ -3545 kg) (Langman et al., 1995; Langman et al., 2012). It is  
 118 assumed that similarity in  $CoT_{min}$  across individuals of differing body masses is due  
 119 to them being geometrically, posturally and physiologically similar and locomoting  
 120 with dynamically similar gaits (Griffin et al., 2004; Langman et al., 2012).  
 121 Surprisingly, despite this explanation being widespread in the literature, there is no  
 122 empirical evidence linking  $CoT_{min}$  across a size range with similar limb kinematics  
 123 and skeletal proportions for a walking gait (the only gait over which dynamic  
 124 similarity can be investigated (Alexander and Jayes, 1983)). In humans, the only  
 125 bipedal species to have been examined across a size range (children-adults), walking  
 126  $CoT_{min}$  scaled in a similar manner to that found across species (i.e.,  $\propto M_b^{-1/3}$ ) (Weyand  
 127 et al., 2010), which is contrary to findings from within quadruped investigations  
 128 where  $CoT_{min}$  was similar across sizes. To fully understand these results it is  
 129 necessary to expand the available data for bipeds and to investigate the relationships  
 130 between the CoT,  $M_b$ , limb-kinematics and skeletal proportions.

131       Domestic Leghorn chickens (*Gallus gallus domesticus*) are selectively bred  
 132 for large and bantam (miniature) varieties providing an opportunity to investigate how  
 133 size influences  $CoT_{min}$  independent of shape in an avian species. Rubenson et al.  
 134 (2007) derived an interspecific scaling equation of walking  $CoT_{min}$  against  $M_b$

135 [CoT<sub>min</sub> = 17.80 ( $\pm$  2.98)  $M_b^{-0.471 (\pm 0.032)}$ ] using minimum measured values of the net  
 136 cost of transport (CoT<sub>net</sub>; the amount of energy required to move 1 kg over 1 m minus  
 137 maintenance and postural costs) for a range of birds and mammals (0.29 – 1542 kg).  
 138 The aim of this study was to investigate whether large (n= 5; mean  $M_b \pm$  s.e.m = 1.92  
 139  $\pm$  0.13 kg; range: 1.62 – 2.19 kg) and bantam (n=9; mean  $M_b \pm$  s.e.m = 1.39  $\pm$  0.03  
 140 kg; range = 1.29 – 1.54 kg) Leghorns would show a 16 % difference in CoT<sub>min</sub> as  
 141 predicted by the Rubenson et al. (2007) equation, and to compare their CoT<sub>min</sub> to  
 142 animals of a similar  $M_b$ . Importantly, we simultaneously determined whether the two  
 143 varieties of Leghorn walked in a dynamically similar way and were geometrically and  
 144 posturally similar to gain insight into the links between these integrated components  
 145 of terrestrial locomotion.

146

## 147 RESULTS

148

### 149 Scaling of morphological measurements

150 Mean linear dimensions measured from large and bantam Leghorns are presented in  
 151 Table 1. The skeletal measurements of the bantams were, on average, ~83 % of those  
 152 of the larger variety. Predicted hind limb dimensions (Table 1) for the bantams, based  
 153 on the percentage difference in sternum length between the two varieties, all fell  
 154 within the range predicted from the large variety data (mean  $\pm$  s.e.m), indicating that  
 155 the axial and appendicular skeletons of the two varieties were geometrically similar.  
 156 Independent samples t-tests (equal variances assumed unless otherwise stated)  
 157 showed that, represented as a proportion of total skeletal leg length ( $l_{\text{skel}}$  = femur +  
 158 tibiotarsus + tarsometatarsus lengths), the femur (0.28 in both varieties) was not  
 159 significantly different (equal variances not assumed: Levene's test,  $F = 13.71$ ,  $p$   
 160  $= 0.003$ ) between varieties ( $t = 1.00$ ,  $df = 4$ ,  $p = 0.374$ ). Similarly, the tibiotarsus ( $t =$   
 161  $0.07$ ,  $df = 12$ ,  $p = 0.948$ ) and tarsometatarsus lengths ( $t = -1.26$ ,  $df = 12$ ,  $p = 0.233$ )  
 162 were the same proportion of total leg length in both varieties (0.42 and 0.30,  
 163 respectively). Femur width, as a proportion of femur length was also similar ( $t = 1.63$ ,  
 164  $df = 12$ ,  $p = 0.128$ ) between both varieties (femur: 0.11 and 0.10 in bantam and large  
 165 Leghorns, respectively). Similarly, the tibiotarsus width:length ratio (0.07 in both  
 166 varieties) did not differ (equal variances not assumed: Levene's test,  $F = 5.25$ ,  $p =$   
 167  $0.041$ ) between varieties ( $t = 1.07$ ,  $df = 5.70$ ,  $p = 0.326$ ) and nor did the

168 tarsometatarsus width/length ratio, which was 0.10 in both ( $t = 0.00$ ;  $df = 12$ ,  $p =$   
 169 1.00). The two varieties therefore shared similar hind limb skeletal proportions.

170 The ratio  $h_{\text{hip}}:l_{\text{skel}}$ , a measure of posture (Gatesy and Biewener 1991), was on  
 171 average ~5 % greater in the bantam compared to the large variety ( $0.79 \pm 0.02$  and  
 172  $0.74 \pm 0.01$ , respectively), but was not statistically different between varieties ( $t =$   
 173  $1.96$ ,  $df = 12$ ,  $p = 0.074$ ). The predicted  $h_{\text{hip}}$  for the bantams (Table 1), however, fell  
 174 outside of the range predicted from the large varieties hip height data, being  
 175 approximately 1 cm shorter than measured. Bantam  $h_{\text{hip}}$  was 0.87 times that of the  
 176 larger birds, which was a greater fraction than found for the skeletal element  
 177 measurements. Therefore, the bantams adopted a more erect posture compared to the  
 178 large variety.

179

### 180 **Walking kinematics**

181 Duty factor (DF) decreased linearly with speed ( $U$ ,  $\text{m s}^{-1}$ ) and neither the slope nor  
 182 intercept of this relationship differed between varieties (Figure 1a; Table 2). Stride  
 183 frequency ( $f_{\text{stride}}$ , Hz) increased at the same rate with  $U$  in both varieties, but was 0.37  
 184 Hz greater in the bantam variety across all  $U$  (Figure 1b; Table 2). Similarly, the  
 185 incremental increase in stride length ( $l_{\text{stride}}$ , m) with  $U$  was the same in both size  
 186 groups, whilst  $l_{\text{stride}}$  was longer by 0.09 m across all  $U$  in the large variety (Figure 1c;  
 187 Table 2). The duration of the swing phase of the limb ( $t_{\text{swing}}$ , s) decreased curvilinearly  
 188 with  $U$  at the same rate in both groups, but was 0.05 s longer in the large variety  
 189 across all  $U$  (Figure 1d; Table 2). Stance phase duration ( $t_{\text{stance}}$ , s) also decreased  
 190 curvilinearly with  $U$  and at the same rate in both size groups.  $t_{\text{stance}}$  was, however, 0.08  
 191 s longer in the large variety across all  $U$  (Figure 1d, Table 2). Therefore, each  
 192 parameter responded to increasing  $U$  the same way in both varieties and differences in  
 193 their absolute values (related to size) were fixed across all speeds.

194

### 195 **Metabolic power and cost of transport**

196 The positive relationship between mass-specific metabolic power ( $P_{\text{met}}$ ,  $\text{W kg}^{-1}$ ) and  
 197 walking  $U$  (Figure 2a) was similar (both the slopes and intercepts) for both varieties  
 198 (Table 1). Calculating  $\text{CoT}_{\text{min}}$  as the slope of this relationship (slope method)  
 199 therefore gives  $16.20 \text{ J kg}^{-1} \text{ m}^{-1}$  in each variety. During quiet standing, resting  
 200 metabolic rate (RMR,  $\text{W kg}^{-1}$ ) did not differ (Figure 2a, Table 2) between bantam and  
 201 large Leghorns ( $7.24 \pm 0.42 \text{ W kg}^{-1}$  and  $7.21 \pm 0.48 \text{ W kg}^{-1}$  respectively), indicating

that they shared the same mass-specific energetic cost of general maintenance and maintaining their posture combined. Therefore, the relationship between net mass-specific metabolic power ( $\text{net-}P_{\text{met}}$ ,  $\text{W kg}^{-1}$ : the metabolic rate required for locomotion exceeding that required for standing quietly) and  $U$  (Figure 2a) was also similar for the two size groups (Table 2).

Total cost of transport ( $\text{CoT}_{\text{tot}}$ ,  $\text{J kg}^{-1} \text{ m}^{-1}$ ) decreased curvilinearly with  $U$  indicating that the highest walking speeds of the birds were most metabolically optimal. Net cost of transport ( $\text{CoT}_{\text{net}}$ ,  $\text{J kg}^{-1} \text{ m}^{-1}$ ;  $\text{net-}P_{\text{met}}/U$ ), however, was not correlated with  $U$  and fell within a similar range for both size groups (bantam: 9.44 - 16.10  $\text{J kg}^{-1} \text{ m}^{-1}$ ; large: 9.72 - 15.33  $\text{J kg}^{-1} \text{ m}^{-1}$ ) (Figure 2b; Table 2). Calculating  $\text{CoT}_{\text{min}}$  as the minimum measured  $\text{CoT}_{\text{net}}$  (subtraction method), taken as the mean of all  $\text{CoT}_{\text{net}}$  values across all speeds and both varieties, gives 13.04  $\text{J kg}^{-1} \text{ m}^{-1}$ . Predicted walking  $\text{CoT}_{\text{min}}$  values for large and bantam Leghorns based on (Rubenson et al., 2007) were 13.09 and 15.24  $\text{J kg}^{-1} \text{ m}^{-1}$ , respectively. Both varieties therefore shared a  $\text{CoT}_{\text{min}}$  closer to that predicted for the larger variety, contrary to the 16 % difference predicted. This corresponds to the bantams having a  $\text{CoT}_{\text{min}}$  ~14 % lower than predicted for their  $M_b$ , which fell within the 95 % C.Is of Rubenson et al.'s (2007) equation. The cost per stride ( $\text{J kg}^{-1} \text{ stride}^{-1}$ ) and its rate of increase with  $U$  were lower in bantams compared to in the larger variety (Fig 2c; Table 2).

## DISCUSSION

Across species,  $\text{CoT}_{\text{min}}$  is reported to scale hypoallometrically with  $M_b$  (Taylor et al., 1970; Fedak et al., 1974; Taylor et al., 1982; Kram and Taylor, 1990; Full and Tu, 1991; Langman et al., 1995; Roberts et al., 1998). However, we find that bantam and large varieties of Leghorn chickens have identical  $\text{CoT}_{\text{min}}$  despite the smallest and largest individuals differing 1.7-fold in  $M_b$  and 1.35-fold in leg length. An independence of  $\text{CoT}_{\text{min}}$  from body size was previously reported within large quadrupedal species (>90 kg) spanning 1.5- to 8-fold ranges in  $M_b$  and up to 2-fold ranges in leg length (Griffin et al., 2004; Maloiy et al., 2009; Langman et al., 2012). The present data represent the first evidence of a lack of correlation between  $M_b$  and  $\text{CoT}_{\text{min}}$  within an avian species. No effect of  $M_b$  or leg length suggests that size itself does not influence the CoT, but rather, some other factor, perhaps correlated with body size, may be responsible.



The simultaneous collection of kinematics and morphological data here allow us to investigate further previous hypotheses on what is driving the interspecific  $\text{CoT}_{\min}$  versus  $M_b$  relationship. Larger species perform the same amount of mass-specific mechanical work as those of smaller species, whilst using less mass-specific metabolic energy during terrestrial locomotion (Fedak et al., 1982; Heglund et al., 1982a; Heglund et al., 1982b; Alexander, 2005). How this is possible is not fully understood. It is generally accepted that  $M_b$  has no independent influence over  $\text{CoT}$  (Pontzer et al 2005; 2007). Leg length, however, is often discussed as the morphological factor explaining the allometry of  $\text{CoT}_{\min}$  (Kram and Taylor 1990; Schmidt 1984; Pedley 1977; Biewener 2003; Alexander 2002) since longer legs allow longer  $t_{\text{stance}}$  for the muscles to apply force through recruiting slower, less metabolically expensive muscle fibres (metabolic rate is inversely proportional to  $t_{\text{stance}}$  during which the muscles apply force) (Kram and Taylor, 1990). In addition, longer limbs allow lower  $f_{\text{stride}}$ , requiring fewer muscle contractions. In the present study, however, the different sized birds shared the same mass-specific  $\text{CoT}_{\min}$ , despite the bantams having shorter limbs, shorter  $t_{\text{stance}}$  and higher  $f_{\text{stride}}$  compared to the larger variety. Using the maximum height of the limb as a strut (effective limb length,  $h_{\text{hip}}$ ) as the indicator of size has been shown to better predict  $\text{CoT}_{\min}$  across species ( $h_{\text{hip}}$ ,  $r^2=0.98$ ), than the sum of the skeletal element lengths ( $L_{\text{skel}}$ ,  $r^2=0.78$ ) (Steudel and Beattie, 1995; Pontzer, 2007). Over a small size scale of analysis, however, it has been demonstrated that between-individual differences in limb arrangement [e.g. limb excursion angle], the cost of swinging the limb and the coefficient of converting metabolic energy into muscle force 'k' (which were not measured in this study) prevent a clear relationship between  $h_{\text{hip}}$  and  $\text{CoT}_{\min}$  [Pontzer 2005; Pontzer 2007b]. In agreement with Pontzer's [Pontzer 2005; Pontzer 2007b] findings, despite the greater absolute  $h_{\text{hip}}$  of the larger variety, compared to the bantams, they did not have a lower  $\text{CoT}_{\min}$  in comparison. It may be that variation in limb excursion angle [i.e. the difference in posture], rather than  $h_{\text{hip}}$ , dominated variation in  $\text{CoT}_{\min}$ . Indeed, by using a model to predict the rate of force production associated with both supporting body weight and swinging the limb as a function of all of these parameters, Pontzer (2007a) found this was a better predictor of metabolic rate than contact time, limb length or  $M_b$  at both inter- and intra-specific levels. Equally, the shared  $\text{CoT}_{\min}$  of the two varieties may be due to their identical



appendicular and axial skeletal geometry, consistent with previous assumption in intraspecific analyses (Langman et al., 2012).

Another potential explanatory factor is limb posture (linked to effective limb length). Across vertebrates, the limb bone lengths scale positively and almost geometrically with  $M_b$ , but become increasingly more aligned with one another and less crouched (Biewener, 1989). A prominent step-change exists in the scaling of both  $CoT_{min}$  and the mechanical cost of transport ( $E_{mech}$ ;  $J\ kg^{-1}\ m^{-1}$ ) across species associated with crouched postures in those  $<1\ kg$  and upright postures in those  $>1\ kg$ , making their efficiency of transport ( $CoT_{min}/E_{mech}$ ) approximately 7% and 26%, respectively (Reilly et al., 2007; Nudds et al., 2009). Unlike larger species with more upright posture, small crouched-postured (non-cursorial) species do not benefit from elastic energy savings, nor pendular mechanisms (Reilly et al., 2007). Furthermore, a more vertical limb decreases the muscular force required to support a unit of body weight and improves the mechanical advantage of the muscles (Biewener, 1989). The change in posture with increasing size means that muscle stress is nearly independent of  $M_b$  across species (rather than  $\propto M_b^{1/3}$ ). Griffin et al (2004) suggested that between closely related individuals, consistent limb posture might account for consistent  $CoT_{min}$  across a range of body sizes since muscle stress would in this case scale geometrically ( $\propto M_b^{1/3}$ ). The volume of active muscle would therefore increase with size and counter any metabolic savings associated with having longer legs (Griffin et al., 2004). However, in the present study the shared  $CoT_{min}$  of the chicken groups did not correspond to similar posture. When comparing the posture of the two size groups as  $h_{hip}:l_{skel}$ , the limbs were 5% more erect in the variety selected for smaller size. The shared  $CoT_{min}$  in this case is perhaps better explained by the posture and lower cost per stride of the bantams. Across avian species,  $h_{hip}$  represents a greater proportion of  $l_{skel}$  with increasing  $M_b$ . One potential explanation for why we find the opposite to what would be expected, as well as the lower cost per stride in the bantams, may be that the two varieties differ in their derived muscle properties or architecture due to selective breeding.

The kinematic data indicate that with  $U$ , the two varieties shared identical rates of change in all parameters, which would be expected to imply geometric, postural and dynamic similarity. Each kinematic parameter differed between the two varieties only by a fixed value across all speeds. The larger variety took longer strides

by 9 cm, less frequent strides by 0.37 Hz and had longer durations of both swing and stance phases of the limb by 0.05 and 0.08 s, respectively. At a given absolute  $U$ , duty factor is generally higher in larger species than smaller ones (Gatesy and Biewener, 1991); however, the duty factors of the chickens were not significantly different between size groups. Similarly, 9 different felid species spanning a 46-fold range in  $M_b$  were found to use similar duty factors at their preferred walking speed (Day and Jayne, 2007). For what was previously an expectation (Griffin et al., 2004; Maloij et al., 2009; Langman et al., 2012), the present data offer the first empirical evidence of a link between identical walking  $\text{CoT}_{\min}$  in individuals of differing size and similar limb dynamics and skeletal geometry. We can speculate that for a given skeletal shape, regardless of  $M_b$ , walking  $\text{CoT}$  may be consistent. Some additional studies in which shape was controlled for also support this idea. For example, adding back loads up to 50% of  $M_b$  has negligible effect on the  $\text{CoT}$  in quadrupedal rats, dogs and horses as well as bipedal humans, guinea fowl and other birds (Taylor et al., 1980; Ellerby and Marsh, 2006; Tickle et al., 2010; Tickle et al., 2013). Furthermore, obese and thin humans of the same height (likely to be similar in skeletal proportions) show no difference in  $\text{CoT}_{\min}$  (Browning et al., 2006).

In contrast to our findings, a comprehensive study of 48 humans spanning a 6-fold range in  $M_b$  and 1.5-fold range in height concluded that  $\text{CoT}_{\min}$  was  $\propto M_b^{-1/3}$  (Weyand et al., 2010). This result, however, may be associated with ontogenetic differences in shape, because the human subjects ranged from 5 to 32 years of age and the data were intentionally separated into four size groups to reduce individual variability (Weyand et al., 2010). Indeed, dividing the  $\text{CoT}$  by body height accounted for the observed differences between the human size groups. Therefore, at any given speed, all subjects incurred the same  $\text{CoT}$  to cover the same horizontal distance relative to their own body height (Weyand et al., 2010). In one of the few invertebrate species examined, small (2 g) ghost crabs (*Ocypode quadrata*) were found to have a higher  $\text{CoT}$  than larger ones (47 g), despite their similar appearance in shape (Tullis and Andrus, 2011). In the absence of detailed kinematic measurements, however, it is not possible to conclude much from this result. It is, of course, possible that the link we find here between energetics, kinematics and skeletal morphometrics may not be characteristic of species with more than two legs.

333

## 334 CONCLUSIONS

335 Leghorn chickens selectively bred for large and bantam varieties shared the same  
 336 walking  $\text{CoT}_{\min}$  despite a 1.70- fold difference in  $M_b$  and 1.35- fold difference in total  
 337 leg length between the smallest and largest individuals. These data represent the first  
 338 evidence of  $\text{CoT}_{\min}$  being independent of  $M_b$  within a small crouched-postured bipedal  
 339 species. Our findings also provide the first evidence (for what was previously only  
 340 assumed) of a link between this and similar walking dynamics and skeletal geometry.  
 341 In contrast to interspecific trends, however, hip height did not scale geometrically  
 342 between varieties and represented a greater proportion of total leg length in the  
 343 bantam variety compared to the large. All birds shared a  $\text{CoT}_{\min}$  closer to that  
 344 predicted for the larger variety and the  $\text{CoT}_{\min}$  of the bantams was approximately 14  
 345 % lower than predicted from their  $M_b$ . Our findings are therefore in agreement with  
 346 the general consensus that for a given body size,  $\text{CoT}_{\min}$  decreases with limb  
 347 erectness. The lower than predicted  $\text{CoT}_{\min}$  in the bantams was also associated with  
 348 lower mass-specific energy requirements per stride, compared to the larger variety,  
 349 which may be linked to differences in their derived muscle morphology/physiology.  
 350 We emphasise the importance of intra- in addition to interspecific investigations as  
 351 well as the combination of kinematics, morphometric and posture measurements  
 352 towards gaining insight into the factors that dictate CoT.

353

354

355

356

357

358

## 359 MATERIALS AND METHODS

### 360 Study species

361 Adult (>16 week) male bantam ( $n = 9$ ; mean  $M_b \pm \text{s.e.m} = 1.39 \pm 0.03$  kg) and large ( $n$   
 362  $= 5$ ; mean  $M_b \pm \text{s.e.m} = 1.92 \pm 0.13$  kg) Leghorn chickens were purchased from a  
 363 local breeder and housed in the University of Manchester's animal unit. All housing  
 364 was maintained on a 13h:11 h light-dark cycle, at 18-22 °C. Food and water were  
 365 provided *ad libitum*, and the birds were not fasted prior to experiments. Birds were  
 366 trained for one week to locomote on a motorised treadmill (T60 Tunturi®, Finland)  
 367 prior to data collection. All experiments were carried out in accordance with the

Animals (Scientific procedures) Act (1986), were approved by the University of Manchester Ethics Committee and performed under a UK Home Office Project Licence held by Dr Codd (40/3549).

## Respirometry

An open flow respirometry system (all equipment Sable Systems International®, Las Vegas, USA) was used to measure the birds' rates of oxygen consumption ( $\dot{V}_{O_2}$ , ml min<sup>-1</sup>) and carbon dioxide production ( $\dot{V}_{CO_2}$ , ml min<sup>-1</sup>). Perspex® respirometry chambers were built (bantam: 66 x 46.5 x 48 cm, large: 97.5 x 53.5 x 48 cm) and mounted upon the treadmill. Air was pulled through the chambers using a FlowKit 500 at flow rates (FRs) of 150 L min<sup>-1</sup> (bantam) and 250 L min<sup>-1</sup> (large). Excurrent airflow was sub-sampled (0.11 L min<sup>-1</sup>) for gas-analysis. Water vapour pressure (WVP) was measured using an RH-300 before the air was scrubbed of H<sub>2</sub>O with calcium chloride (2-6mm granular, Merck, Darmstadt, Germany) and passed through a CO<sub>2</sub> analyser (CA-10A). The dry air was scrubbed of CO<sub>2</sub> using soda lime (2-5mm granular, Sigma Aldrich, Steinheim Germany) and passed through a dual absolute and differential O<sub>2</sub> analyser (Oxilla II). Ambient air (scrubbed of H<sub>2</sub>O and CO<sub>2</sub> as before) was simultaneously passed through a second O<sub>2</sub> channel on the Oxilla II at 0.11 L min<sup>-1</sup> by a pump (SS-3) to enable calculation of differential O<sub>2</sub> concentration ( $\Delta O_2$ ). CO<sub>2</sub> traces were base-lined to calculate differential CO<sub>2</sub> concentration ( $\Delta CO_2$ ). Voltage outputs were recorded using a UI2 interface and analysed using ExpeData® v 1.1.15 software. The accuracy of the respirometry set up ( $\pm 5\%$ ) across all speeds was determined using a N<sub>2</sub> dilution test (Fedak et al., 1981). Primary flow rates (FR) were adjusted to dry-corrected flow rates (FR<sub>c</sub>), to account for the H<sub>2</sub>O scrubbed from air samples prior to gas measurements using

$$FR_c = \frac{FR \cdot (BP - WVP)}{BP} \quad (1)$$

where BP is barometric pressure (measured with the Oxilla II) and WVP is water vapour pressure (Lighton, 2008).  $\dot{V}_{O_2}$  was calculated using (Lighton, 2008)

$$\dot{V}_{O_2} = \frac{FR_c (\Delta O_2)}{(1 - 0.2095)} \quad (2)$$

399

400 and  $\dot{V}_{\text{CO}_2}$  using (Lighton, 2008)

401

$$402 \quad \dot{V}_{\text{CO}_2} = \frac{(\text{FR}_c(\Delta\text{CO}_2) - (0.0004(\dot{V}_{\text{O}_2})))}{(1 - 0.0004)} \quad (3)$$

403       The birds were exercised over a range of randomised speeds (3 per day) up to  
404 the maximum sustainable (bantam: 0.28-1.11 m s<sup>-1</sup>, large: 0.28-1.39 m s<sup>-1</sup>). Birds  
405 were given a rest of a minimum of 5 min to stand quietly between each period of  
406 exercise. RMRs were taken from the final rest period of each trial. Data were  
407 collected from stable gas readings lasting >1 min. Only data from speeds at which  
408 both varieties used a walking gait (0.28, 0.42, 0.56 and 0.69 m s<sup>-1</sup>) were included in  
409 analyses.

410

#### 411 **Metabolic rate calculations**

412 Five values were calculated at each speed: (1)  $P_{\text{met}}$ , was converted from  $\dot{V}_{\text{O}_2}$ , using  
413 respiratory exchange ratios (RERs:  $\dot{V}_{\text{CO}_2} : \dot{V}_{\text{O}_2}$ ) and thermal equivalents taken from  
414 Brody (1945); (2) net- $P_{\text{met}}$  was calculated by subtracting RMR from locomotor  $P_{\text{met}}$   
415 (both from the same trial); (3) CoT<sub>tot</sub> was calculated as  $P_{\text{met}}/U$ ; (4) CoT<sub>net</sub> was  
416 calculated as net- $P_{\text{met}}/U$ ; and (5) the cost per stride was calculated as net- $P_{\text{met}}/f_{\text{stride}}$ .

417       CoT<sub>min</sub> was calculated using two methods. First as the slope of the linear  
418 relationship between  $P_{\text{met}}$  and  $U$  (slope method) and, second, as the minimum  
419 measured CoT<sub>net</sub> (subtraction method). CoT<sub>min</sub> values calculated using the subtraction  
420 method were compared with predictions for walking birds and mammals of a similar  
421  $M_b$  using equation 3 from Rubenson et al. (2007).

422

#### 423 **Gait kinematics**

424 The birds were filmed (100 frames s<sup>-1</sup>) at all speeds in lateral view using a video  
425 camera (HDR-XR520VE, Sony, Japan). The left foot of each bird was tracked ( $\approx 10$   
426 strides) at each speed using Tracker software (v. 4.05, Open Source Physics) in order  
427 to quantify DF,  $f_{\text{stride}}$ ,  $l_{\text{stride}}$  ( $U/f_{\text{stride}}$ ),  $t_{\text{stance}}$  and  $t_{\text{swing}}$ . Fluctuations in the kinetic and  
428 potential energy of the centre of mass (CoM) across a stride were determined through  
429 frame-by-frame tracking of a marker positioned over the left hip joint of the birds

(indicative of hip height,  $h_{\text{hip}}$ ). To ensure that the birds were using a walking gait at all speeds analysed, the phase relationship between the horizontal kinetic energy ( $E_{\text{kh}}$ ) and the sum of the potential and vertical kinetic energies ( $E_{\text{p}} + E_{\text{kv}}$ ) of the CoM ( $h_{\text{hip}}$ ) was determined. An out-of-phase relationship, indicating a walking gait, was found for all speeds used in the analyses.

### **Morphological measurements**

Keel length and the length and width (mid-shaft) of the right femur, tibiotarsus and tarsometatarsus was measured from the birds used in the respirometry experiments using digital vernier calipers (accuracy,  $\pm 0.01$  mm). Geometric similarity in linear dimensions between the two size groups was investigated by determining whether their axial and appendicular dimensions scaled 1:1. The mean appendicular dimensions of the bantams were predicted based on the ratio of their keel length: large variety keel length. Skeletal element lengths were also compared as a percentage of total leg length. The ratio of  $h_{\text{hip}}$  to total skeletal leg length ( $l_{\text{skel}} = \text{femur} + \text{tibiotarsus} + \text{tarsometatarsus}$  lengths) was calculated and used as a means of comparing posture between the two size groups, with a lower value indicating a more crouched posture. Back height ( $h_{\text{back}}$ , m) was measured during the mid-stance as the distance from the hind toe to the back at  $90^\circ$  to the direction of travel. Where birds ( $N=3$ ) did not walk with ease with a hip marker, the ratio  $h_{\text{hip}}: h_{\text{back}}$  (bantam:  $0.80 \pm 0.01$ , large:  $0.77 \pm 0.00$ ) was used to estimate  $h_{\text{hip}}$ .

### **Statistical analyses**

The slopes and the intercepts of the relationships between the dependent variables (metabolic or kinematics measures) and  $U$  were investigated for differences between chicken varieties using general linear models (GLMs). Models included variety as a fixed factor,  $U$  as a covariate and the interaction term (variety x  $U$ ). If the interaction term was non-significant (indicating similar slopes between varieties), it was removed from the model and the updated model was rerun (assuming parallel lines) in order to test for differences in intercepts. Where the relationship between a dependent variable and  $U$  was curvilinear the data were  $\log_{10}$  transformed. All best-fit lines were taken from coefficients-tables produced by the GLMs. Between-variety differences in hind-limb skeletal element proportions (% total leg length) were investigated using

463 independent samples t-tests. Hind-limb proportion data were tested for equality of  
464 variance using a Levene's test for equality of variance.

465

#### 466 **List of abbreviations**

|     |                  |                                   |
|-----|------------------|-----------------------------------|
| 467 | $U$              | speed                             |
| 468 | $CoT_{tot}$      | total cost of transport           |
| 469 | $CoT_{net}$      | net cost of transport             |
| 470 | $CoT_{min}$      | minimum cost of transport         |
| 471 | DF               | duty factor                       |
| 472 | $f_{stride}$     | stride frequency                  |
| 473 | $l_{stride}$     | stride length                     |
| 474 | $net-P_{met}$    | net metabolic power               |
| 475 | $P_{met}$        | metabolic power                   |
| 476 | RMR              | resting metabolic rate            |
| 477 | $t_{swing}$      | swing duration                    |
| 478 | $t_{stance}$     | stance duration                   |
| 479 | $\dot{V}_{CO_2}$ | rate of carbon dioxide production |
| 480 | $\dot{V}_{O_2}$  | rate of oxygen consumption        |

481

#### 482 **Acknowledgements**

483 We would like to thank John Lees and Karlina Ozolina for their assistance with  
484 respirometry data collection.

485

#### 486 **Competing interests**

487 The authors declare that they have no competing interests

488

#### 489 **Authors' contributions**

490 The study was conceived and designed by JC and RN. KR collected and analysed all  
491 data with assistance from RN and JC. All authors contributed to preparation of the  
492 manuscript, approved and read the final submission.

493

494



495 Funding

496 This research was supported through funding provided by the BBSRC (G01138/1 and  
497 I0021116/1 to J.R.C). K.A.R was supported by a NERC DTA PhD stipend and CASE  
498 partnership with The Manchester Museum.

499 **References**

500

- 501 **Abourachid, A.** (2001). Kinematic parameters of terrestrial locomotion in  
502 cursorial (ratites), swimming (ducks), and striding birds (quail and guinea fowl).  
503 *Comp Biochem Physiol A Mol Integr Physiol* **131**, 113-119.
- 504 **Alexander, R. M.** (2005). Models and the scaling of energy costs for locomotion. *J*  
505 *Exp Biol* **208**, 1645-1652.
- 506 **Alexander, R. M. and Jayes, A. S.** (1983). A dynamic similarity hypothesis for  
507 the gaits of quadrupedal mammals. *J Zool* **201**, 135-152.
- 508 **Baudinette, R. V., Miller, A. M. and Sarre, M. P.** (2000). Aquatic and terrestrial  
509 locomotory energetics in a toad and a turtle: A search for generalisations among  
510 ectotherms. *Physiol. Biochem. Zool.* **73**, 672-682.
- 511 **Biewener, A. A.** (1989). Scaling body support in mammals - limb posture and  
512 muscle mechanics. *Science* **245**, 45-48.
- 513 **Brody, S.** (1945). Bioenergetics and growth, with special reference to the  
514 efficiency complex in domestic animals. New York: Reinhold.
- 515 **Browning, R. C., Baker, E. A., Herron, J. A. and Kram, R.** (2006). Effects of  
516 obesity and sex on the energetic cost and preferred speed of walking. *J Appl*  
517 *Physiol* **100**, 390-398.
- 518 **Bruinzeel, L. W., Piersma, T. and Kersten, M.** (1999). Low costs of terrestrial  
519 locomotion in waders. *Ardea* **87**, 199-205.
- 520 **Cavagna, G. A., Heglund, N. C. and Taylor, C. R.** (1977). Mechanical work in  
521 terrestrial locomotion - two basic mechanisms for minimizing energy-  
522 expenditure. *Am J Physiol* **233**, R243-R261.
- 523 **Dawson, T. J. and Taylor, C. R.** (1973). Energetic cost of locomotion in  
524 kangaroos. *Nature* **246**, 313-314.
- 525 **Day, L. M. and Jayne, B. C.** (2007). Interspecific scaling of the morphology and  
526 posture of the limbs during the locomotion of cats (Felidae). *J Exp Biol* **210**, 642-  
527 654.
- 528 **Ellerby, D. J. and Marsh, R. L.** (2006). The energetic costs of trunk and distal-  
529 limb loading during walking and running in guinea fowl *Numida meleagris*: II.  
530 Muscle energy use as indicated by blood flow. *J Exp Biol* **209**, 2064-2075.
- 531 **Fedak, M. A., Pinshow, B. and Schmidt, K.** (1974). Energy cost of bipedal  
532 running. *Am J Physiol* **227**, 1038-1044.
- 533 **Fedak, M. A., Rome, L. and Seeherman, H. J.** (1981). One-step N<sub>2</sub>-dilution  
534 technique for calibrating open-circuit V<sub>O2</sub> measuring systems. *J. Appl. Physiol.*  
535 **51**, 772-776.
- 536 **Fedak, M. A., Heglund, N. C. and Taylor, C. R.** (1982). Energetics and mechanics  
537 of terrestrial locomotion. II. Kinetic energy changes of the limbs and body as a  
538 function of speed and body size in birds and mammals. *J Exp Biol* **97**, 23-40.
- 539 **Fish, F. E., Frappell, P. B., Baudinette, R. V. and MacFarlane, P. M.** (2000).  
540 Energetics of terrestrial locomotion of the platypus: metabolic inefficiencies due  
541 to aquatic adaptation. *Am Zool* **40**, 1015-1016.
- 542 **Fish, F. E., Frappell, P. B., Baudinette, R. V. and MacFarlane, P. M.** (2001).  
543 Energetics of terrestrial locomotion of the platypus *Ornithorhynchus anatinus*. *J*  
544 *Exp Biol* **204**, 797-803.
- 545 **Full, R. J. and Tu, M. S.** (1991). Mechanics of a rapid running insect: two-, four-  
546 and six-legged locomotion. *J Exp Biol* **156**, 215-231.

547 **Full, R. J., Zuccarello, D. A. and Tullis, A.** (1990). Effect of variation in form on  
548 the cost of terrestrial locomotion. *J Exp Biol* **150**, 233-246.

549 **Garland, T.** (1983). The relation between maximal running speed and body-  
550 mass in terrestrial mammals. *J Zool* **199**, 157-170.

551 **Gatesy, S. M. and Biewener, A. A.** (1991). Bipedal locomotion - effects of speed,  
552 size and limb posture in birds and humans. *J Zool* **224**, 127-147.

553 **Griffin, T. M. and Kram, R.** (2000). Biomechanics - penguin waddling is not  
554 wasteful. *Nature* **408**, 929-929.

555 **Griffin, T. M., Kram, R., Wickler, S. J. and Hoyt, D. F.** (2004). Biomechanical and  
556 energetic determinants of the walk-trot transition in horses. *J Exp Biol* **207**,  
557 4215-4223.

558 **Halsey, L. G. and White, C. R.** (2012). Comparative energetics of mammalian  
559 locomotion: humans are not different. *J Hum Evol* **63**, 718-722.

560 **Heglund, N. C. and Taylor, C. R.** (1988). Speed, stride frequency and energy-cost  
561 per stride - how do they change with body size and gait. *J Exp Biol* **138**, 301-318.

562 **Heglund, N. C., Cavagna, G. A. and Taylor, C. R.** (1982a). Energetics and  
563 mechanics of terrestrial locomotion .3. Energy changes of the center of mass as a  
564 function of speed and body size in birds and mammals. *J Exp Biol* **97**, 41-56.

565 **Heglund, N. C., Fedak, M. A., Taylor, C. R. and Cavagna, G. A.** (1982b).  
566 Energetics and mechanics of terrestrial locomotion .4. Total mechanical energy  
567 changes as a function of speed and body size in birds and mammals. *J Exp Biol*  
568 **97**, 57-66.

569 **Janis, C. M. and Wilhelm, P. B.** (1993). Were there mammalian pursuit  
570 predators in the Tertiary? Dances with wolf avatars. *J. Mamm. Evol.* **1**, 103-125.

571 **Kram, R. and Taylor, C. R.** (1990). Energetics of running - a new perspective.  
572 *Nature* **346**, 265-267.

573 **Langman, V. A., Rowe, M. F., Roberts, T. J., Langman, N. V. and Taylor, C. R.**  
574 (2012). Minimum cost of transport in Asian elephants: do we really need a bigger  
575 elephant? *J Exp Biol* **215**, 1509-1514.

576 **Langman, V. A., Roberts, T. J., Black, J., Maloiy, G. M. O., Heglund, N. C.,**  
577 **Webers, J. M., Kram, R. and Taylor, C. R.** (1995). Moving cheaply - energetics of  
578 walking in the African elephant. *J Exp Biol* **198**, 629-632.

579 **Lighton, J. R. B.** (2008). Measuring metabolic rates : a manual for scientists.  
580 Oxford ; New York: Oxford University Press.

581 **Maloiy, G. M. O., Rugangazi, B. M. and Rowe, M. F.** (2009). Energy expenditure  
582 during level locomotion in large desert ungulates: the one-humped camel and  
583 the domestic donkey. *J Zool* **277**, 248-255.

584 **Margaria, R., Sassi, G., Aghemo, P. and Cerretelli, P.** (1963). Energy cost of  
585 running. *J Appl Physiol* **18**, 367-370.

586 **Minetti, A. E., Ardigo, L. P., Reinach, E. and Saibene, F.** (1999). The  
587 relationship between mechanical work and energy expenditure of locomotion in  
588 horses. *J Exp Biol* **202**, 2329-2338.

589 **Nudds, R. L., Codd, J. R. and Sellers, W. I.** (2009). Evidence for a mass  
590 dependent step-change in the scaling of efficiency in terrestrial Locomotion. *Plos*  
591 *One* **4**.

592 **Nudds, R. L., Gardiner, J. D., Tickle, P. G. and Codd, J. R.** (2010). Energetics and  
593 kinematics of walking in the barnacle goose (*Branta leucopsis*). *Comp Biochem*  
594 *Physiol A Mol Integr Physiol* **156**, 318-324.

595 **Nudds, R. L., Folkow, L. P., Lees, J. J., Tickle, P. G., Stokkan, K. A. and Codd, J.**  
596 **R.** (2011). Evidence for energy savings from aerial running in the Svalbard rock  
597 ptarmigan (*Lagopus muta hyperborea*). *Proc R Soc B* **278**, 2654-2661.  
598 **Pontzer, H.** (2005). A new model predicting locomotor cost from limb length via  
599 force production. *J Exp Biol* **208**, 1513-1524.  
600 **Pontzer, H.** (2007). Effective limb length and the scaling of locomotor cost in  
601 terrestrial animals. *J Exp Biol* **210**, 1752-1761.  
602 **Reilly, S. M., McElroy, E. J. and Biknevicius, A. R.** (2007). Posture, gait and the  
603 ecological relevance of locomotor costs and energy-saving mechanisms in  
604 tetrapods. *Zoology* **110**, 271-289.  
605 **Roberts, T. J., Kram, R., Weyand, P. G. and Taylor, C. R.** (1998). Energetics of  
606 bipedal running I. Metabolic cost of generating force. *J Exp Biol* **201**, 2745-2751.  
607 **Rubenson, J., Heliams, D. B., Lloyd, D. G. and Fournier, P. A.** (2004). Gait  
608 selection in the ostrich: mechanical and metabolic characteristics of walking and  
609 running with and without an aerial phase. *Proc R Soc B* **271**, 1091-1099.  
610 **Rubenson, J., Heliams, D. B., Maloney, S. K., Withers, P. C., Lloyd, D. G. and**  
611 **Fournier, P. A.** (2007). Reappraisal of the comparative cost of human  
612 locomotion using gait-specific allometric analyses. *J Exp Biol* **210**, 3513-3524.  
613 **Schmidt-Nielsen, K.** (1975). Scaling in biology - consequences of size. *J Exp Zool*  
614 **194**, 287-308.  
615 **Schmidt-Nielsen, K.** (1984). Scaling, why is animal size so important?  
616 Cambridge ; New York: Cambridge University Press.  
617 **Steudel, K. and Beattie, J.** (1995). Does limb length predict the relative  
618 energetic cost of locomotion in mammals. *J Zool* **235**, 501-514.  
619 **Taylor, C. R., Schmidt, K. and Raab, J. L.** (1970). Scaling of energetic cost of  
620 running to body size in mammals. *Am J Physiol* **219**, 1104-1107.  
621 **Taylor, C. R., Heglund, N. C. and Maloiy, G. M. O.** (1982). Energetics and  
622 mechanics of terrestrial Locomotion. 1. Metabolic energy-consumption as a  
623 function of speed and body size in birds and mammals. *J Exp Biol* **97**, 1-21.  
624 **Taylor, C. R., Heglund, N. C., McMahon, T. A. and Looney, T. R.** (1980).  
625 Energetic cost of generating muscular force during running - a comparison of  
626 large and small animals. *J Exp Biol* **86**, 9-18.  
627 **Tickle, P. G., Richardson, M. F. and Codd, J. R.** (2010). Load carrying during  
628 locomotion in the barnacle goose (*Branta leucopsis*): The effect of load  
629 placement and size. *Comp. Biochem. Physiol. Part A Mol. Integr. Physiol.* **156**, 309-  
630 317.  
631 **Tickle, P. G., Lean, S. C., Rose, K. A., Wadugodapitiya, A. P. and Codd, J. R.**  
632 (2013). The influence of load carrying on the energetics and kinematics of  
633 terrestrial locomotion in a diving bird. *Biol Open* **2**, 1239-1244.  
634 **Tullis, A. and Andrus, S. C.** (2011). The cost of incline locomotion in ghost crabs  
635 (*Ocypode quadrata*) of different sizes. *J Comp Physiol B* **181**, 873-881.  
636 **Watson, R. R., Rubenson, J., Coder, L., Hoyt, D. F., Propert, M. W. and Marsh,**  
637 **R. L.** (2011). Gait-specific energetics contributes to economical walking and  
638 running in emus and ostriches. *Proc R Soc B* **278**, 2040-2046.  
639 **Weyand, P. G., Smith, B. R., Puyau, M. R. and Butte, N. F.** (2010). The mass-  
640 specific energy cost of human walking is set by stature. *J Exp Biol* **213**, 3972-  
641 3979.

642 **Yousef, M. K., Freeland, D. V. and Dill, D. B.** (1972). Energetic cost of grade  
643 walking in man and burro, *Equus-asinus* - desert and mountain. *J Appl Physiol* **33**,  
644 337-340.  
645 **Yousef, M. K., Webster, M. E. D. and Yousef, O. M.** (1989). Energy costs of  
646 walking in camels, *camelus-dromedarius*. *Physiol Zool* **62**, 1080-1088.  
647 **Zani, P. A. and Kram, R.** (2008). Low metabolic cost of locomotion in ornate box  
648 turtles, *Terrapene ornata*. *J Exp Biol* **211**, 3671-3676.  
649  
650

651

652

653

654

655

656 **Figure 1 Relationships between kinematics parameters and walking speed.** Red

657 filled circles and solid lines represent data for bantam Leghorns and open circles and

658 dashed lines represent data for large Leghorns.. The lines of best fit are (a) duty factor

659 =  $-0.18U + 0.79$  (bantam) and =  $-0.18U + 0.78$  (large), (b) stride frequency =  $1.51U +$

660  $0.83$  (bantam) and =  $1.51U + 0.46$  (large), (c) stride length =  $0.36U + 0.13$  (bantam)

661 and =  $0.36U + 0.23$  (large) and (d) swing time =  $0.16U^{0.22}$  (bantam) and =  $0.21U^{0.22}$

662 (large), and stance time =  $0.28U^{0.64}$  (bantam), and =  $0.36U^{0.64}$  (large). Data points

663 are means  $\pm$  s.d. (standard errors are not large enough to be seen).

664

665 **Figure 2 Relationships between mass-specific energetic parameters and walking**

666 **speed.** Data points and best-fit lines indicate the same as in Figure 1. The lines of best

667 fit are (a)  $P_{\text{met}} = 16.20U + 6.93$  (bantam), and =  $16.20U + 5.86$  (large), and net- $P_{\text{met}}$

668 =  $16.00U - 0.88$  (bantam), and =  $16.00U - 1.26$  (large); (b)  $\text{COT}_{\text{tot}} = 22.39U^{0.50}$

669 (bantam) and =  $19.95U^{0.50}$  (large), and  $\text{COT}_{\text{net}} = 4.77U + 11.89$  (bantam), and =

670  $4.77U + 10.53$  (large); and (c) cost per stride =  $7.10U + 2.42$  (bantam) and =  $21.21U +$

671  $0.24$  (large). Mass-specific resting (standing) metabolic rates are also included on

672 graphs (a) at  $0 \text{ m s}^{-1}$ . Data points are means  $\pm$  s.e.m.

673

674  
675

**Table 1 Hind limb segment measurements and sternal keel lengths (mm) from the birds used in experiments and geometric predictions for appendicular measurements of the bantams**

| length/width                  | bantam ( $\pm$ s.e.m)            | large ( $\pm$ s.e.m) | bantam prediction <sup>b</sup> |
|-------------------------------|----------------------------------|----------------------|--------------------------------|
| $l_{\text{keel}}$             | 90.00 ( $\pm$ 1.30) <sup>a</sup> | 107.40 ( $\pm$ 5.29) |                                |
| $l_{\text{fem}}$              | 71.04 ( $\pm$ 0.83)              | 85.92 ( $\pm$ 1.74)  | <b>70.71 – 73.64</b>           |
| $l_{\text{tib}}$              | 107.21 ( $\pm$ 1.23)             | 129.29 ( $\pm$ 2.19) | <b>106.77 – 110.44</b>         |
| $l_{\text{tars}}$             | 75.45 ( $\pm$ 1.19)              | 93.15 ( $\pm$ 2.36)  | <b>76.27 – 80.23</b>           |
| $l_{\text{skel}}$             | 253.70 ( $\pm$ 3.11)             | 308.37 ( $\pm$ 6.06) | <b>253.94 – 264.12</b>         |
| $w_{\text{fem}}$              | 7.78 ( $\pm$ 0.11)               | 8.96 ( $\pm$ 0.24)   | 7.33 – 7.73                    |
| $w_{\text{tib}}$              | 7.18 ( $\pm$ 0.11)               | 8.62 ( $\pm$ 0.25)   | <b>7.03 – 7.45</b>             |
| $w_{\text{tars}}$             | 7.57 ( $\pm$ 0.15)               | 9.27 ( $\pm$ 0.22)   | <b>7.60 – 7.97</b>             |
| $h_{\text{hip}}$ <sup>c</sup> | 200.00 ( $\pm$ 3)                | 229.00 ( $\pm$ 6)    | 187.85 – 197.54                |

676  
677  
678  
679  
680  
681  
682  
683

Bold values represent geometric predictions that were not significantly different from observed bantam measurements

<sup>a</sup> N= 6 for bantam sternum measurements

<sup>b</sup> predicted value ranges for the bantams were calculated as (large linear dimension  $\pm$  s.e.m) x (0.84) based on the percentage difference in keel length between the varieties

<sup>c</sup>  $h_{\text{hip}}$  measurements are given to the nearest mm because the measurements were made in metres to the nearest mm

684



685 **Table 2 Results of the GLMs that tested for differences in metabolic and kinematic measurements between chicken varieties**

| parameter                                                                 | covariate/<br>factor<br>interaction <sup>a</sup> | <u>GLM1</u><br><i>df</i> <sup>b</sup> | <i>F</i> | <i>P</i> | <u>GLM2</u><br><i>df</i> <sup>b</sup> | <i>F</i> | <i>P</i> | $n_p^2$ | Observed power | $r^2$ <sup>c</sup> |
|---------------------------------------------------------------------------|--------------------------------------------------|---------------------------------------|----------|----------|---------------------------------------|----------|----------|---------|----------------|--------------------|
| DF                                                                        | <i>U</i>                                         | 1,47                                  | 61.90    | <0.001   | 1,48                                  | 59.43    | <0.001   | 0.56    | 1.00           | 0.54               |
|                                                                           | variety                                          | 1,47                                  | 0.70     | 0.406    | 1,48                                  | 1.80     | 0.186    | 0.04    | 0.30           |                    |
|                                                                           | variety x <i>U</i>                               | 1,47                                  | 0.17     | 0.199    | *                                     | *        | *        | *       | *              |                    |
| $f_{\text{stride}}$ (Hz)                                                  | <i>U</i>                                         | 1,47                                  | 217.96   | <0.001   | 1,48                                  | 231.94   | <0.001   | 0.84    | 1.00           | 0.88               |
|                                                                           | variety                                          | 1,47                                  | 5.52     | 0.023    | 1,48                                  | 144.11   | <0.001   | 0.77    | 1.00           |                    |
|                                                                           | variety x <i>U</i>                               | 1,47                                  | 1.80     | 0.186    | *                                     | *        | *        | *       | *              |                    |
| $l_{\text{stride}}$ (m)                                                   | <i>U</i>                                         | 1,47                                  | 242.10   | <0.001   | 1,48                                  | 244.37   | <0.001   | 0.85    | 1.00           | 0.89               |
|                                                                           | variety                                          | 1,47                                  | 8.42     | 0.006    | 1,48                                  | 172.30   | <0.001   | 0.80    | 1.00           |                    |
|                                                                           | variety x <i>U</i>                               | 1,47                                  | 1.20     | 0.228    | *                                     | *        | *        | *       | *              |                    |
| $\log_{10} t_{\text{swing}}$ (s)                                          | $\log_{10} U$                                    | 1,47                                  | 17.14    | <0.001   | 1,48                                  | 18.57    | <0.001   | 0.29    | 0.99           | 0.65               |
|                                                                           | variety                                          | 1,47                                  | 13.22    | 0.001    | 1,48                                  | 78.62    | <0.001   | 0.66    | 1.00           |                    |
|                                                                           | variety x $\log_{10} U$                          | 1,47                                  | 0.02     | 0.877    | *                                     | *        | *        | *       | *              |                    |
| $\log_{10} t_{\text{stance}}$ (s)                                         | $\log_{10} U$                                    | 1,47                                  | 339.11   | <0.001   | 1,48                                  | 341.40   | <0.001   | 0.88    | 1.00           | 0.90               |
|                                                                           | variety                                          | 1,47                                  | 10.38    | 0.002    | 1,48                                  | 117.64   | <0.001   | 0.72    | 1.00           |                    |
|                                                                           | variety x $\log_{10} U$                          | 1,47                                  | 1.48     | 0.230    | *                                     | *        | *        | *       | *              |                    |
| RMR (W kg <sup>-1</sup> )                                                 | variety                                          | 1,12                                  | 1.64     | 0.22     | *                                     | *        | *        | *       | *              | 0.05               |
| $P_{\text{met}}$ (W kg <sup>-1</sup> )                                    | <i>U</i>                                         | 1,50                                  | 52.61    | <0.001   | 1,51                                  | 53.35    | <0.001   | 0.51    | 1.00           | 0.50               |
|                                                                           | variety                                          | 1,50                                  | 1.59     | 0.214    | 1,51                                  | 2.31     | 0.135    | 0.04    | 0.32           |                    |
|                                                                           | variety x <i>U</i>                               | 1,50                                  | 0.71     | 0.404    | *                                     | *        | *        | *       | *              |                    |
| Net- $P_{\text{met}}$ (W kg <sup>-1</sup> )                               | <i>U</i>                                         | 1,50                                  | 52.94    | <0.001   | 1,51                                  | 53.23    | <0.001   | 0.51    | 1.00           | 0.49               |
|                                                                           | variety                                          | 1,50                                  | 1.08     | 0.303    | 1,51                                  | 0.29     | 0.591    | 0.00    | 0.08           |                    |
|                                                                           | variety x <i>U</i>                               | 1,50                                  | 0.85     | 0.362    | *                                     | *        | *        | *       | *              |                    |
| $\log_{10} \text{CoT}_{\text{tot}}$ (J kg <sup>-1</sup> m <sup>-1</sup> ) | $\log_{10} U$                                    | 1,50                                  | 28.34    | <0.001   | 1,51                                  | 33.43    | <0.001   | 0.53    | 1.00           | 0.71               |
|                                                                           | variety                                          | 1,50                                  | 0.01     | 0.912    | 1,51                                  | 3.79     | 0.057    | 0.05    | 0.35           |                    |
|                                                                           | variety x $\log_{10} U$                          | 1,50                                  | 0.93     | 0.338    | *                                     | *        | *        | *       | *              |                    |
| $\text{CoT}_{\text{net}}$ (J kg <sup>-1</sup> m <sup>-1</sup> )           | <i>U</i>                                         | 1,50                                  | 1.82     | 0.184    | 1,51                                  | 1.08     | 0.304    | 0.02    | 0.18           | 0.00               |
|                                                                           | variety                                          | 1,50                                  | 2.35     | 0.132    | 1,51                                  | 0.87     | 0.355    | 0.02    | 0.16           |                    |
|                                                                           | variety x <i>U</i>                               | 1,50                                  | 1.71     | 0.196    | *                                     | *        | *        | *       | *              |                    |
| Net cost per stride<br>(J kg <sup>-1</sup> stride <sup>-1</sup> )         | <i>U</i>                                         | 1,46                                  | 18.07    | <0.001   |                                       |          |          | 0.28    | 0.99           | 0.44               |
|                                                                           | variety                                          | 1,46                                  | 0.42     | 0.521    |                                       |          |          | 0.01    | 0.10           |                    |
|                                                                           | variety x <i>U</i>                               | 1,46                                  | 4.49     | 0.039    |                                       |          |          | 0.09    | 0.55           |                    |

687 <sup>a</sup> speed ( $U$ , m s<sup>-1</sup>) is a covariate, chicken variety is a fixed factor and variety x  $U$  the interaction term in the models  
 688 <sup>b</sup>  $df$  are represented as ( $df$ , error  $df$ )  
 689 <sup>c</sup> the adjusted  $r^2$  values are reported for second GLM analyses  
 690 variables that did not have a significant effect on parameters were not included in second GLM analyses and are represented by an asterisk



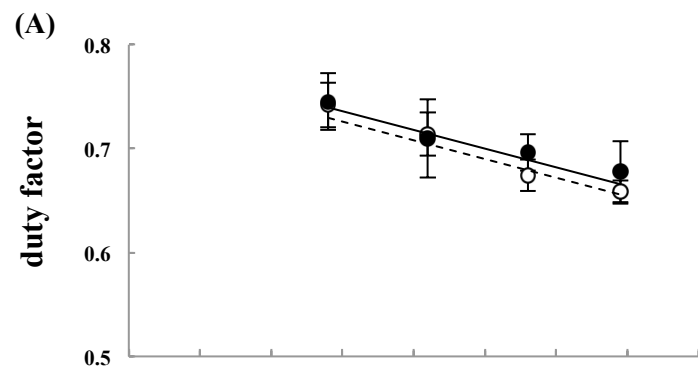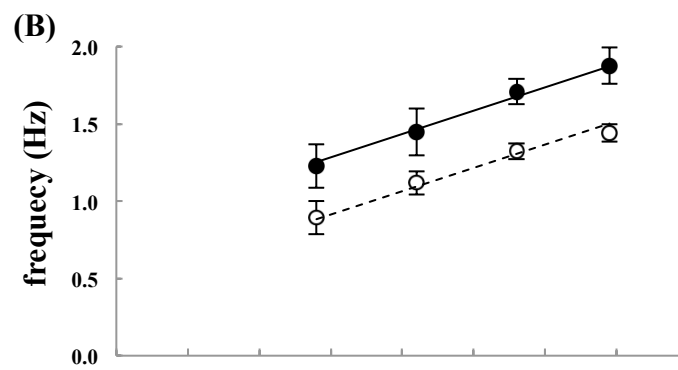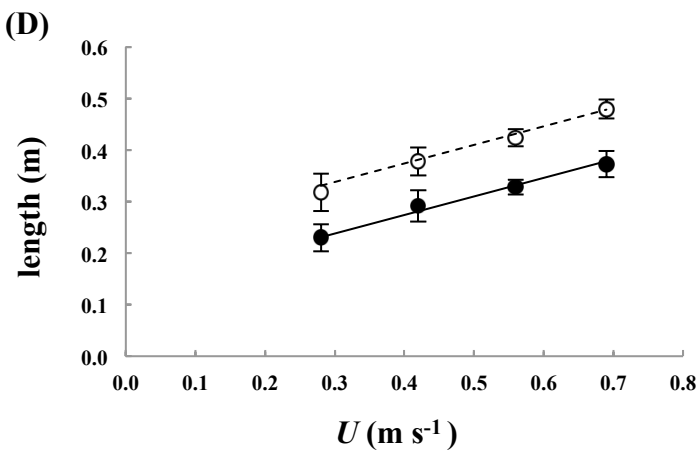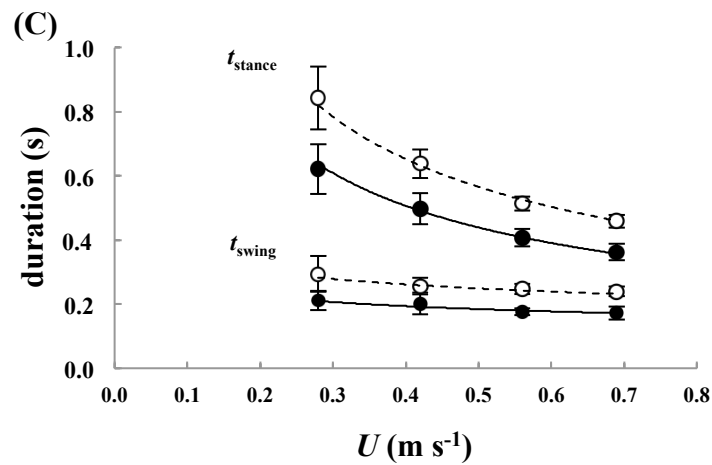

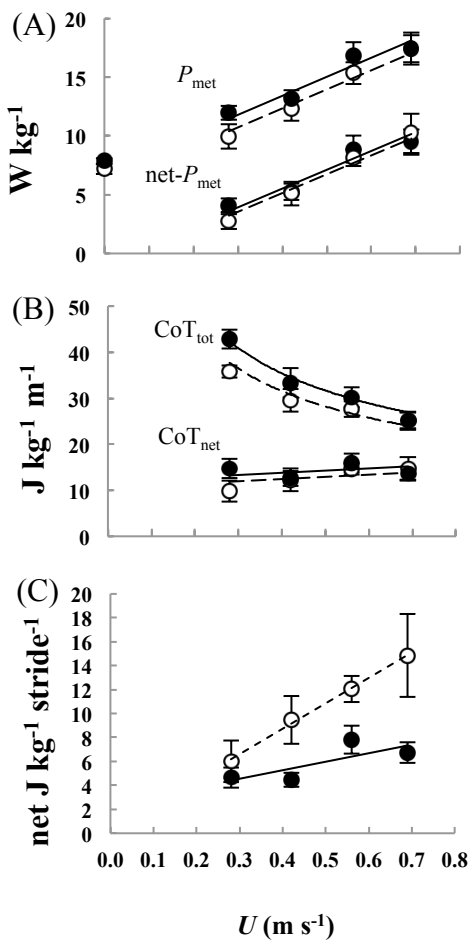

Source: https://cob.silverchair.com/jeb/article-pdf/doi/10.1242/jeb.111393/2032980/jeb_111393.pdf
